# Supplementary material
Source: Elsevier journal article supplement (https://www.sciencedirect.com/science/article/pii/S253113792100136X)
Supplement: mmc1 [file S253113792100136X:mmc1.docx]

Supplementary Figure 1: Proportional mortality not adjusted by acute lymphoid leukemia, men and women, Brazil, between 1979 and 2019.


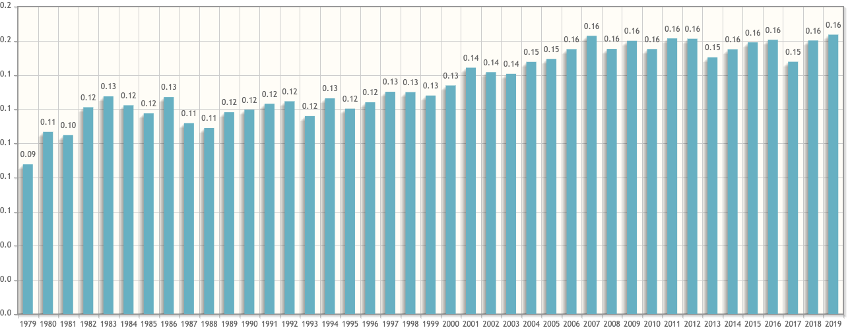


**Source:** <https://www.inca.gov.br/MortalidadeWeb/pages/Modelo01/consultar.xhtml;jsessionid=78355B182935245AAFA93CFB59532742#panelResultado>
