# Supplementary material
Source: Elsevier journal article supplement (https://www.sciencedirect.com/science/article/pii/S253113792100136X)
Supplement: mmc2 [file S253113792100136X:mmc2.docx]

Supplementary Table 1: Mortality rates due to acute lymphoblastic leukemia, gross and adjusted by age, world and Brazilian populations in 2010, per 100,000 men and women, Brazil in 2019.

| Men | | Women | | All | |  |
| --- | --- | --- | --- | --- | --- | --- |
| Ages | Number of deaths | Specific Rate | Number of deaths | Specific Rate | Number of deaths | Specific Rate |
| 00 to 04 | 67 | 0.89 | 58 | 0.81 | 125 | 0.85 |
| 05 to 09 | 78 | 0.97 | 70 | 0.91 | 148 | 0.94 |
| 10 to 14 | 74 | 0.86 | 56 | 0.68 | 130 | 0.77 |
| 15 to 19 | 83 | 0.95 | 38 | 0.45 | 121 | 0.71 |
| 20 to 29 | 108 | 0.63 | 69 | 0.41 | 177 | 0.52 |
| 30 to 39 | 73 | 0.44 | 73 | 0.43 | 146 | 0.44 |
| 40 to 49 | 76 | 0.58 | 63 | 0,46 | 139 | 0,52 |
| 50 to 59 | 105 | 1.02 | 107 | 0.96 | 212 | 0.99 |
| 60 to 69 | 167 | 2.64 | 130 | 1.78 | 297 | 2.18 |
| 70 to 79 | 215 | 7.13 | 145 | 3.65 | 360 | 5.15 |
| 80 or over | 166 | 13.31 | 187 | 9.07 | 353 | 10.67 |
| Age unknown | 0 | 0 | 0 | 0 | 0 | 0 |
| Total | 1,212 | - | 996 | - | 2,208 | - |
| Gross Rate | - | 1.2 | - | 0.96 | - | 1.08 |
| World standard rate | - | 1.21 | - | 0.87 | - | 1.03 |
| Brazil standard rate | - | 1.25 | - | 0.89 | - | 1.05 |

Source: MS/SVS/DASIS/CGIAE/Information System on Mortality - SIM MP/Brazilian Geography and Statistics Institute - IBGE MS/INCA/Conprev/Surveillance Division
